# Supplementary material for: Microglia TREM2R47H Alzheimer-linked variant enhances excitatory transmission and reduces LTP via increased TNF-α levels
Source: eLife. 2020 Jun 24;9:e57513. doi: 10.7554/eLife.57513 (PMC7338048; doi:10.7554/eLife.57513)
Supplement: Figure 1—source data 1. [file elife-57513-fig1-data1.xlsx]

## Sheet: FIG1
Table Analyzed	Ab38						Ab38	w/w	RH/w	RH/RH
Data sets analyzed	A-C							189.721	161.205	190.262
								156.496	100.124	146.527
ANOVA summary								222.115	188.638	175.751
F	0.5339							149.993	198.905	156.196
P value	0.5887							173.487	173.771	125.773
P value summary	ns							245.201	83.8085	228.909
Significant diff. among means (P < 0.05)?	No							175.469	177.831	211.195
R squared	0.01546							226.018	214.396	155.533
								117.639	192.523	101.956
Brown-Forsythe test								131.459	222.313	132.382
F (DFn, DFd)	0.5078 (2, 68)							162.738	195.409	204.66
P value	0.6041							230.955	168.506	221.369
P value summary	ns							143.772	205.696	100.89
Are SDs significantly different (P < 0.05)?	No							190.478	197.638	211.297
								186.405	237.897	148.698
Bartlett's test								193.648	195.994	210.633
Bartlett's statistic (corrected)	0.964							175.299		197.744
P value	0.6175							234.729		203.464
P value summary	ns							198.642		191.771
Are SDs significantly different (P < 0.05)?	No							216.466		179.898
								251.368		197.109
ANOVA table	SS	DF	MS	F (DFn, DFd)	P value			259.283		156.076
Treatment (between columns)	1647	2	823.7	F (2, 68) = 0.5339	P=0.5887			248.715		206.317
Residual (within columns)	104900	68	1543					184.488		205.8
Total	106547	70						127.527		194.45
								204.66		181.786
Data summary								195.409		177.27
Number of treatments (columns)	3							103.243
Number of values (total)	71
Table Analyzed	Ab40						Ab40	w/w	RH/w	RH/RH
Data sets analyzed	A-C							654.353	611.763	727.537
								537.8	435.238	568.897
ANOVA summary								789.285	675.186	634.619
F	1.01							552.609	767.637	544.747
P value	0.3696							621.865	638.845	413.776
P value summary	ns							913.596	333.617	743.339
Significant diff. among means (P < 0.05)?	No							623.712	686.062	640.309
R squared	0.02885							871.106	806.612	642.936
								371.531	789.308	407.291
Brown-Forsythe test								471.226	813.429	515.99
F (DFn, DFd)	1.919 (2, 68)							469.83	775.963	690.802
P value	0.1546							800.537	603.15	756.853
P value summary	ns							551.849	825.998	361.218
Are SDs significantly different (P < 0.05)?	No							720.712	652.594	729.293
								638.591	822.169	531.954
Bartlett's test								675.444	695.101	667.917
Bartlett's statistic (corrected)	3.506							609.303		656.423
P value	0.1733							842.595		735.649
P value summary	ns							786.661		693.948
Are SDs significantly different (P < 0.05)?	No							719.918		614.368
								936.643		772.978
ANOVA table	SS	DF	MS	F (DFn, DFd)	P value			1026.48		551.462
Treatment (between columns)	40426	2	20213	F (2, 68) = 1.010	P=0.3696			859.578		725.727
Residual (within columns)	1360963	68	20014					740.621		731.818
Total	1401389	70						440.743		749.109
								707.589		620.537
Data summary								681.989		667.526
Number of treatments (columns)	3							475.142
Number of values (total)	71
Table Analyzed	Ab42						Ab42	w/w	RH/w	RH/RH
Data sets analyzed	A-C							80.5019	73.5759	86.1098
								54.7888	37.8603	58.345
ANOVA summary								107.692	81.5287	79.9969
F	0.4376							51.873	96.0312	56.9227
P value	0.6474							77.7386	83.8142	28.5533
P value summary	ns							118.017	35.5272	83.2533
Significant diff. among means (P < 0.05)?	No							78.1291	94.6476	63.1539
R squared	0.01271							120.922	116.273	83.8625
								26.5997	97.3461	40.3342
Brown-Forsythe test								43.2927	112.189	60.6405
F (DFn, DFd)	1.272 (2, 68)							35.577	99.1127	89.5363
P value	0.2869							95.7621	63.2729	98.2348
P value summary	ns							57.3474	101.968	34.3169
Are SDs significantly different (P < 0.05)?	No							78.0884	83.4186	87.991
								67.8976	103.239	57.0558
Bartlett's test								76.2432	76.7184	87.7811
Bartlett's statistic (corrected)	2.163							62.1553		81.7439
P value	0.3391							112.367		93.3504
P value summary	ns							106.788		89.116
Are SDs significantly different (P < 0.05)?	No							84.8471		73.0135
								119.887		111.444
ANOVA table	SS	DF	MS	F (DFn, DFd)	P value			131.461		63.9102
Treatment (between columns)	558.5	2	279.2	F (2, 68) = 0.4376	P=0.6474			103.488		95.3511
Residual (within columns)	43389	68	638.1					96.6176		108.792
Total	43947	70						36.9084		109.472
								87.0156		76.7887
Data summary								77.1019		88.9655
Number of treatments (columns)	3							46.492
Number of values (total)	71
Table Analyzed	Ab42/Ab40						Ab42/Ab40	w/w	RH/w	RH/RH
Data sets analyzed	A-C							0.123025	0.120269	0.118358
								0.101876	0.086988	0.102558
ANOVA summary								0.136442	0.12075	0.126055
F	1.564							0.093869	0.1251	0.104494
P value	0.2168							0.125009	0.131196	0.069007
P value summary	ns							0.129179	0.106491	0.111999
Significant diff. among means (P < 0.05)?	No							0.125265	0.137958	0.09863
R squared	0.04397							0.138814	0.14415	0.130437
								0.071595	0.123331	0.09903
Brown-Forsythe test								0.091872	0.13792	0.117523
F (DFn, DFd)	0.8704 (2, 68)							0.075723	0.127729	0.129612
P value	0.4234							0.119622	0.104904	0.129794
P value summary	ns							0.103919	0.123449	0.095003
Are SDs significantly different (P < 0.05)?	No							0.108349	0.127826	0.120652
								0.106324	0.125569	0.107257
Bartlett's test								0.112879	0.11037	0.131425
Bartlett's statistic (corrected)	1.155							0.10201		0.124529
P value	0.5614							0.133358		0.126895
P value summary	ns							0.135748		0.128419
Are SDs significantly different (P < 0.05)?	No							0.117857		0.118843
								0.127997		0.144175
ANOVA table	SS	DF	MS	F (DFn, DFd)	P value			0.12807		0.115892
Treatment (between columns)	0.0009281	2	0.000464	F (2, 68) = 1.564	P=0.2168			0.120394		0.131387
Residual (within columns)	0.02018	68	0.0002967					0.130455		0.148659
Total	0.02111	70						0.083741		0.146136
								0.122975		0.123745
Data summary								0.113054		0.133276
Number of treatments (columns)	3							0.097849
Number of values (total)	71
