# Supplementary material for: Microglia TREM2R47H Alzheimer-linked variant enhances excitatory transmission and reduces LTP via increased TNF-α levels
Source: eLife. 2020 Jun 24;9:e57513. doi: 10.7554/eLife.57513 (PMC7338048; doi:10.7554/eLife.57513)
Supplement: Figure 2—source data 1. [file elife-57513-fig2-data1.xlsx]

## Sheet: FIG2 IFNgamma
Table Analyzed	IFNg						w/w	RH/w	RH/RH
Data sets analyzed	A-C						0.890282	0.809906	0.869737
							1.14562	0.933248	0.951768
ANOVA summary							1.047	0.810888	0.887348
F	0.1762						1.07412	0.828566	0.903965
P value	0.8392						0.909826	0.806957	0.95956
P value summary	ns						0.878545	1.05281	0.992639
Significant diff. among means (P < 0.05)?	No						0.92154	0.929346	1.00139
R squared	0.01057						1.13308	1.14658	0.999442
							0.840555	1.11462	0.997739
Brown-Forsythe test							1.12859	1.27498	1.23767
F (DFn, DFd)	1.154 (2, 33)						1.01589	1.11182	1.13279
P value	0.3276						1.01496	1.00239	1.27685
P value summary	ns
Are SDs significantly different (P < 0.05)?	No
Bartlett's test
Bartlett's statistic (corrected)	1.401
P value	0.4964
P value summary	ns
Are SDs significantly different (P < 0.05)?	No
ANOVA table	SS	DF	MS	F (DFn, DFd)	P value
Treatment (between columns)	0.006313	2	0.003156	F (2, 33) = 0.1762	P=0.8392
Residual (within columns)	0.591	33	0.01791
Total	0.5973	35
Data summary
Number of treatments (columns)	3
Number of values (total)	36

## Sheet: FIG2 IL-10
Table Analyzed	IL-10							w/w	RH/w	RH/RH
Data sets analyzed	A-C							1.30832	0.952126	0.920346
								1.0623	1.13751	1.0623
ANOVA summary								1.05627	0.905199	0.801935
F	0.1781							0.905199	1.12248	1.08037
P value	0.8376							0.766898	1.05778	1.07133
P value summary	ns							0.897622	1.00651	0.867288
Significant diff. among means (P < 0.05)?	No							1.12549	0.888526	1.14802
R squared	0.01068							0.877909	0.936998	1.08488
								0.835285	1.13505	0.803713
Brown-Forsythe test								1.12143	0.953682	1.23418
F (DFn, DFd)	0.9912 (2, 33)							1.07422	0.968166	1.11144
P value	0.3819							0.969071	0.87682	1.11507
P value summary	ns
Are SDs significantly different (P < 0.05)?	No
Bartlett's test
Bartlett's statistic (corrected)	2.333
P value	0.3114
P value summary	ns
Are SDs significantly different (P < 0.05)?	No
ANOVA table	SS	DF	MS	F (DFn, DFd)	P value
Treatment (between columns)	0.006212	2	0.003106	F (2, 33) = 0.1781	P=0.8376
Residual (within columns)	0.5754	33	0.01744
Total	0.5816	35
Data summary
Number of treatments (columns)	3
Number of values (total)	36

## Sheet: FIG2 IL-13
Table Analyzed	IL-13						w/w	RH/w	RH/RH
Data sets analyzed	A-C						1.18739	1.19213	0.939951
							1.02377	0.929992	1.01398
ANOVA summary							0.892447	1.02132	1.01643
F	2.595						0.831689	0.977109	1.13738
P value	0.0898						1.03109	0.869766	1.15171
P value summary	ns						0.934974	0.824032	1.08209
Significant diff. among means (P < 0.05)?	No						1.02865	1.06757	1.15648
R squared	0.1359						1.06999	0.939951	1.1945
							0.700441	1.07922	1.01012
Brown-Forsythe test							1.02936	1.26142	0.949574
F (DFn, DFd)	0.04832 (2, 33)						1.08687	0.976672	1.4484
P value	0.9529						1.18332	0.832515	1.23754
P value summary	ns
Are SDs significantly different (P < 0.05)?	No
Bartlett's test
Bartlett's statistic (corrected)	0.03438
P value	0.983
P value summary	ns
Are SDs significantly different (P < 0.05)?	No
ANOVA table	SS	DF	MS	F (DFn, DFd)	P value
Treatment (between columns)	0.1016	2	0.05081	F (2, 33) = 2.595	P=0.0898
Residual (within columns)	0.6462	33	0.01958
Total	0.7478	35
Data summary
Number of treatments (columns)	3
Number of values (total)	36

## Sheet: FIG2 IL-1beta
Table Analyzed	IL-1B						w/w	RH/w	RH/RH
Data sets analyzed	A-C						1.01277	1.02926	1.00518
							0.930266	1.02926	1.20738
ANOVA summary							0.965344	0.938374	1.07013
F	10.52						1.12932	0.951871	1.17413
P value	0.0003						0.950522	0.966241	1.12844
P value summary	***						1.02793	1.06658	1.02971
Significant diff. among means (P < 0.05)?	Yes						1.02704	1.08474	1.14121
R squared	0.3893						0.956813	1.05816	1.05993
							0.965189	0.959344	1.056
Brown-Forsythe test							0.993989	1.09243	1.12226
F (DFn, DFd)	0.07394 (2, 33)						1.06323	1.03284	1.10178
P value	0.9289						0.977596	1.06467	1.12046
P value summary	ns
Are SDs significantly different (P < 0.05)?	No
Bartlett's test
Bartlett's statistic (corrected)	0.07067
P value	0.9653
P value summary	ns
Are SDs significantly different (P < 0.05)?	No
ANOVA table	SS	DF	MS	F (DFn, DFd)	P value
Treatment (between columns)	0.06789	2	0.03395	F (2, 33) = 10.52	P=0.0003
Residual (within columns)	0.1065	33	0.003227
Total	0.1744	35
Data summary
Number of treatments (columns)	3
Number of values (total)	36
Number of families	1
Number of comparisons per family	3
Alpha	0.05
Tukey's multiple comparisons test	Mean Diff.	95.00% CI of diff.	Significant?	Summary	Adjusted P Value
w/w vs. RH/w	-0.02281	-0.07972 to 0.03409	No	ns	0.5921	A-B
w/w vs. RH/RH	-0.1014	-0.1583 to -0.04448	Yes	***	0.0003	A-C
RH/w vs. RH/RH	-0.07857	-0.1355 to -0.02166	Yes	**	0.0051	B-C
Test details	Mean 1	Mean 2	Mean Diff.	SE of diff.	n1	n2	q	DF
w/w vs. RH/w	1	1.023	-0.02281	0.02319	12	12	1.391	33
w/w vs. RH/RH	1	1.101	-0.1014	0.02319	12	12	6.183	33
RH/w vs. RH/RH	1.023	1.101	-0.07857	0.02319	12	12	4.791	33

## Sheet: FIG2 IL-4
Table Analyzed	IL-4							w/w	RH/w	RH/RH
Data sets analyzed	A-C							0.856638	0.662285	0.546506
								1.27533	0.859398	0.924927
ANOVA summary								1.06788	0.769761	0.620346
F	1.763							1.21941	1.00637	0.761211
P value	0.1873							0.821919	0.934373	0.814926
P value summary	ns							0.812124	1.11817	0.884131
Significant diff. among means (P < 0.05)?	No							0.859398	1.13607	0.892332
R squared	0.09654							1.0873	1.07954	1.03529
								0.679718	1.15868	0.903833
Brown-Forsythe test								1.22923	1.18454	1.05877
F (DFn, DFd)	0.1835 (2, 33)							1.02898	1.19291	1.11595
P value	0.8332							1.06208	1.07823	1.09289
P value summary	ns
Are SDs significantly different (P < 0.05)?	No
Bartlett's test
Bartlett's statistic (corrected)	0.1097
P value	0.9466
P value summary	ns
Are SDs significantly different (P < 0.05)?	No
ANOVA table	SS	DF	MS	F (DFn, DFd)	P value
Treatment (between columns)	0.1164	2	0.0582	F (2, 33) = 1.763	P=0.1873
Residual (within columns)	1.089	33	0.03301
Total	1.206	35
Data summary
Number of treatments (columns)	3
Number of values (total)	36

## Sheet: FIG2 IL-5
Table Analyzed	IL-5						w/w	RH/w	RH/RH
Data sets analyzed	A-C						0.921313	0.865765	0.959715
							0.887186	0.879192	0.908284
ANOVA summary							1.06477	0.923905	0.947024
F	0.8137						1.03855	0.916115	0.846739
P value	0.4519						1.03855	1.1343	1.15688
P value summary	ns						0.934225	1.09757	1.17029
Significant diff. among means (P < 0.05)?	No						0.96979	1.1022	1.10451
R squared	0.047						1.14562	1.09292	1.15013
							0.82875	1.23962	0.988457
Brown-Forsythe test							1.08178	1.31285	1.0867
F (DFn, DFd)	0.7968 (2, 33)						1.08211	1.1385	1.16455
P value	0.4593						1.00736	0.988803	1.08638
P value summary	ns
Are SDs significantly different (P < 0.05)?	No
Bartlett's test
Bartlett's statistic (corrected)	2.004
P value	0.3671
P value summary	ns
Are SDs significantly different (P < 0.05)?	No
ANOVA table	SS	DF	MS	F (DFn, DFd)	P value
Treatment (between columns)	0.02272	2	0.01136	F (2, 33) = 0.8137	P=0.4519
Residual (within columns)	0.4607	33	0.01396
Total	0.4834	35
Data summary
Number of treatments (columns)	3
Number of values (total)	36

## Sheet: Fig2 IL-6
Table Analyzed	IL-6						w/w	RH/w	RH/RH
Data sets analyzed	A-C						1.09518	1.03193	1.05221
							0.940758	0.994375	0.950286
ANOVA summary							1.05818	1.01166	1.0373
F	0.464						0.941354	0.977093	1.13996
P value	0.6328						0.916349	0.925873	1.13578
P value summary	ns						0.992587	1.09995	1.07489
Significant diff. among means (P < 0.05)?	No						0.956838	1.09398	1.02418
R squared	0.02735						1.09876	1.09637	1.06056
							0.913638	1.06065	0.926717
Brown-Forsythe test							0.930669	1.05189	0.897201
F (DFn, DFd)	0.1058 (2, 33)						1.19617	0.905726	0.943128
P value	0.8999						0.959525	1.12309	1.00561
P value summary	ns
Are SDs significantly different (P < 0.05)?	No
Bartlett's test
Bartlett's statistic (corrected)	0.6976
P value	0.7055
P value summary	ns
Are SDs significantly different (P < 0.05)?	No
ANOVA table	SS	DF	MS	F (DFn, DFd)	P value
Treatment (between columns)	0.005995	2	0.002997	F (2, 33) = 0.4640	P=0.6328
Residual (within columns)	0.2132	33	0.00646
Total	0.2192	35
Data summary
Number of treatments (columns)	3
Number of values (total)	36

## Sheet: FIG2 CXCL1
Table Analyzed	KC-GRO						w/w	RH/w	RH/RH
Data sets analyzed	A-C						0.908517	0.994974	1.41867
							0.765122	1.05415	1.26689
ANOVA summary							0.826109	1.09439	1.49156
F	4.653						0.886828	1.1167	1.38698
P value	0.0166						1.14434	1.08724	1.42395
P value summary	*						1.13988	1.25183	1.28725
Significant diff. among means (P < 0.05)?	Yes						1.07294	1.07294	1.2137
R squared	0.22						1.25626	1.14523	1.12562
							0.913638	1.06065	0.926717
Brown-Forsythe test							0.930669	1.05189	0.897201
F (DFn, DFd)	5.381 (2, 33)						1.19617	0.905726	0.943128
P value	0.0095						0.959525	1.12309	1.00561
P value summary	**
Are SDs significantly different (P < 0.05)?	Yes
Bartlett's test
Bartlett's statistic (corrected)	8.289
P value	0.0159
P value summary	*
Are SDs significantly different (P < 0.05)?	Yes
ANOVA table	SS	DF	MS	F (DFn, DFd)	P value
Treatment (between columns)	0.2405	2	0.1203	F (2, 33) = 4.653	P=0.0166
Residual (within columns)	0.853	33	0.02585
Total	1.093	35
Data summary
Number of treatments (columns)	3
Number of values (total)	36
Number of families	1
Number of comparisons per family	3
Alpha	0.05
Tukey's multiple comparisons test	Mean Diff.	95.00% CI of diff.	Significant?	Summary	Adjusted P Value
w/w vs. RH/w	-0.0799	-0.2410 to 0.08115	No	ns	0.4516	A-B
w/w vs. RH/RH	-0.1989	-0.3600 to -0.03789	Yes	*	0.0128	A-C
RH/w vs. RH/RH	-0.119	-0.2801 to 0.04202	No	ns	0.1808	B-C
Test details	Mean 1	Mean 2	Mean Diff.	SE of diff.	n1	n2	q	DF
w/w vs. RH/w	1	1.08	-0.0799	0.06563	12	12	1.722	33
w/w vs. RH/RH	1	1.199	-0.1989	0.06563	12	12	4.287	33
RH/w vs. RH/RH	1.08	1.199	-0.119	0.06563	12	12	2.565	33

## Sheet: FIG2 TNF-alpha
Table Analyzed	TNFa						w/w	RH/w	RH/RH
Data sets analyzed	A-C						1.17569	1.25747	1.68714
							0.697164	1.05795	1.42002
ANOVA summary							0.98653	1.11599	1.32042
F	17.32						1.01288	1.01852	1.58686
P value	<0.0001						0.924236	1.00159	1.32412
P value summary	****						0.98653	1.01288	1.41818
Significant diff. among means (P < 0.05)?	Yes						1.07857	1.24262	1.90826
R squared	0.5121						1.1384	1.1328	1.4145
							1.0844	1.27419	1.43428
Brown-Forsythe test							0.926573	1.21696	0.855048
F (DFn, DFd)	1.329 (2, 33)						0.986727	1.08219	1.261
P value	0.2785						1.0023	0.856168	1.32582
P value summary	ns
Are SDs significantly different (P < 0.05)?	No
Bartlett's test
Bartlett's statistic (corrected)	7.717
P value	0.0211
P value summary	*
Are SDs significantly different (P < 0.05)?	Yes
ANOVA table	SS	DF	MS	F (DFn, DFd)	P value
Treatment (between columns)	1.104	2	0.5522	F (2, 33) = 17.32	P<0.0001
Residual (within columns)	1.052	33	0.03188
Total	2.156	35
Data summary
Number of treatments (columns)	3
Number of values (total)	36
Number of families	1
Number of comparisons per family	3
Alpha	0.05
Tukey's multiple comparisons test	Mean Diff.	95.00% CI of diff.	Significant?	Summary	Adjusted P Value
w/w vs. RH/w	-0.1058	-0.2846 to 0.07309	No	ns	0.3272	A-B
w/w vs. RH/RH	-0.413	-0.5918 to -0.2341	Yes	****	<0.0001	A-C
RH/w vs. RH/RH	-0.3072	-0.4861 to -0.1283	Yes	***	0.0005	B-C
Test details	Mean 1	Mean 2	Mean Diff.	SE of diff.	n1	n2	q	DF
w/w vs. RH/w	1	1.106	-0.1058	0.07289	12	12	2.052	33
w/w vs. RH/RH	1	1.413	-0.413	0.07289	12	12	8.012	33
RH/w vs. RH/RH	1.106	1.413	-0.3072	0.07289	12	12	5.96	33
