# Supplementary material for: Microglia TREM2R47H Alzheimer-linked variant enhances excitatory transmission and reduces LTP via increased TNF-α levels
Source: eLife. 2020 Jun 24;9:e57513. doi: 10.7554/eLife.57513 (PMC7338048; doi:10.7554/eLife.57513)
Supplement: Figure 3—source data 1. [file elife-57513-fig3-data1.xlsx]

## Sheet: FIG3 IFNgamma
Table Analyzed	IFNg						w/w	RH/w	RH/RH
Data sets analyzed	A-C						1.42333	2.10535	3.08347
							4.26907	2.13177	3.41751
ANOVA summary							1.86656	2.18454	3.73671
F	0.7008						2.38173	2.86379	4.83472
P value	0.4997						2.30299	1.46396	1.74644
P value summary	ns						4.24383	2.11856	2.3555
Significant diff. among means (P < 0.05)?	No						3.68576	1.59888	0.984661
R squared	0.0202						6.56932	2.90264	2.31612
							1.90649	2.44722	2.2109
Brown-Forsythe test							2.19772	3.4815	2.26355
F (DFn, DFd)	0.9341 (2, 68)						1.86656	2.90264	3.00606
P value	0.3979						2.11856	4.34476	3.31496
P value summary	ns						2.23723	1.69288	2.38173
Are SDs significantly different (P < 0.05)?	No						2.82492	3.03187	2.81195
							4.24383	2.25039	3.14788
Bartlett's test							4.44555	2.0789	2.49953
Bartlett's statistic (corrected)	3.474						2.02596		3.6985
P value	0.176						2.81195		3.64752
P value summary	ns						2.18454		3.71124
Are SDs significantly different (P < 0.05)?	No						1.85324		5.68154
							1.73306		2.30299
ANOVA table	SS	DF	MS	F (DFn, DFd)	P value		3.86388		3.94006
Treatment (between columns)	1.594	2	0.7971	F (2, 68) = 0.7008	P=0.4997		3.60925		2.17135
Residual (within columns)	77.34	68	1.137				3.66027		1.05393
Total	78.94	70					2.17135		0.661454
							2.44722		2.10535
Data summary							2.0789		2.9673
Number of treatments (columns)	3						2.69507
Number of values (total)	71

## Sheet: Fig3 IL-10
Table Analyzed	IL-10						w/w	RH/w	RH/RH
Data sets analyzed	A-C						3.05514	0	0.44246
							0	0	0.814316
ANOVA summary							2.27416	0.148345	3.91129
F	5.651						0	0	1.24352
P value	0.0054						0	0	0
P value summary	**						0.546256	0.875881	0
Significant diff. among means (P < 0.05)?	Yes						2.75534	0	0
R squared	0.1425						0	0	1.16206
							0	0	0.896382
Brown-Forsythe test							2.79535	3.29453	0.463258
F (DFn, DFd)	3.780 (2, 68)						0	2.97526	1.58858
P value	0.0278						0	0.463258	0.752651
P value summary	*						0	0.546256	0
Are SDs significantly different (P < 0.05)?	Yes						0.64963	7.83092	4.22879
							0.937353	0	2.67528
Bartlett's test							0.732072	0	4.05026
Bartlett's statistic (corrected)	17.29						0		1.2028
P value	0.0002						0.546256		4.08995
P value summary	***						0		5.59259
Are SDs significantly different (P < 0.05)?	Yes						0		4.46657
							0		0.084092
ANOVA table	SS	DF	MS	F (DFn, DFd)	P value		0.67026		7.43935
Treatment (between columns)	36.22	2	18.11	F (2, 68) = 5.651	P=0.0054		0.628985		6.28154
Residual (within columns)	217.9	68	3.204				1.83116		1.56833
Total	254.1	70					0		0
							0.546256		3.07511
Data summary							0		4.7832
Number of treatments (columns)	3						1.22317
Number of values (total)	71
Number of families	1
Number of comparisons per family	3
Alpha	0.05
Tukey's multiple comparisons test	Mean Diff.	95.00% CI of diff.	Significant?	Summary	Adjusted P Value
w/w vs. RH/w	-0.323	-1.667 to 1.021	No	ns	0.8335	A-B
w/w vs. RH/RH	-1.567	-2.724 to -0.4100	Yes	**	0.0051	A-C
RH/w vs. RH/RH	-1.244	-2.597 to 0.1093	No	ns	0.0779	B-C
Test details	Mean 1	Mean 2	Mean Diff.	SE of diff.	n1	n2	q	DF
w/w vs. RH/w	0.6854	1.008	-0.323	0.561	28	16	0.8143	68
w/w vs. RH/RH	0.6854	2.252	-1.567	0.4828	28	27	4.59	68
RH/w vs. RH/RH	1.008	2.252	-1.244	0.5647	16	27	3.115	68

## Sheet: FIG3 IL-13
Table Analyzed	IL-13						w/w	RH/w	RH/RH
Data sets analyzed	A-C						0	1.81631	0.914129
							0.450821	0.355012	0.922926
ANOVA summary							0.68696	0.878739	1.26129
F	26.21						0.440425	0.68696	1.35051
P value	<0.0001						0.677537	0.905311	1.70273
P value summary	****						0.834033	0.797867	0.896474
Significant diff. among means (P < 0.05)?	Yes						0.287722	0.571732	0.983983
R squared	0.4354						0.62034	0.561897	0.806944
							0.975315	0.561897	0.887617
Brown-Forsythe test							0.299171	0.975315	0.742892
F (DFn, DFd)	0.2335 (2, 68)						0.031295	1.22025	1.74837
P value	0.7924						0.049422	1.39062	1.46215
P value summary	ns						0	0.843018	1.31823
Are SDs significantly different (P < 0.05)?	No						0.542107	1.09514	1.2939
							0.178902	1.04418	1.27762
Bartlett's test							0.461162	0.491874	0.922926
Bartlett's statistic (corrected)	0.8406						0.940464		0.983983
P value	0.6569						0.806944		1.212
P value summary	ns						0.860922		1.09514
Are SDs significantly different (P < 0.05)?	No						0.408885		1.56407
							0.940464		2.19115
ANOVA table	SS	DF	MS	F (DFn, DFd)	P value		0.125565		1.51723
Treatment (between columns)	7.195	2	3.598	F (2, 68) = 26.21	P<0.0001		0.896474		1.32632
Residual (within columns)	9.332	68	0.1372				0.715052		2.12615
Total	16.53	70					1.20375		0.542107
							0.440425		1.00127
Data summary							0.321774		1.53288
Number of treatments (columns)	3						0.376773
Number of values (total)	71
Number of families	1
Number of comparisons per family	3
Alpha	0.05
Tukey's multiple comparisons test	Mean Diff.	95.00% CI of diff.	Significant?	Summary	Adjusted P Value
w/w vs. RH/w	-0.3668	-0.6450 to -0.08862	Yes	**	0.0066	A-B
w/w vs. RH/RH	-0.7234	-0.9629 to -0.4840	Yes	****	<0.0001	A-C
RH/w vs. RH/RH	-0.3566	-0.6367 to -0.07658	Yes	**	0.009	B-C
Test details	Mean 1	Mean 2	Mean Diff.	SE of diff.	n1	n2	q	DF
w/w vs. RH/w	0.5205	0.8873	-0.3668	0.1161	28	16	4.468	68
w/w vs. RH/RH	0.5205	1.244	-0.7234	0.09992	28	27	10.24	68
RH/w vs. RH/RH	0.8873	1.244	-0.3566	0.1169	16	27	4.315	68

## Sheet: FIG3 IL-1beta
Table Analyzed	IL-1B						w/w	RH/w	RH/RH
Data sets analyzed	A-C						0	4.38519	2.36918
							1.3191	2.95459	4.1002
ANOVA summary							0.064333	3.77488	4.80607
F	2.473						0	3.44398	4.77128
P value	0.0919						1.92143	1.229	1.92143
P value summary	ns						0.755266	5.39038	3.81129
Significant diff. among means (P < 0.05)?	No						4.56147	0	6.8826
R squared	0.0678						2.08638	3.7384	3.36962
							4.06431	1.13759	0.950213
Brown-Forsythe test							2.36918	4.38519	4.73644
F (DFn, DFd)	0.09471 (2, 68)						1.27421	3.18228	3.33232
P value	0.9098						0.205097	4.13603	4.45587
P value summary	ns						1.83791	1.53938	3.36962
Are SDs significantly different (P < 0.05)?	No						3.66523	5.25406	4.13603
							3.66523	1.83791	2.99277
Bartlett's test							3.33232	1.66859	2.56716
Bartlett's statistic (corrected)	1.122						3.29494		5.42436
P value	0.5707						2.95459		2.60639
P value summary	ns						4.06431		2.72341
Are SDs significantly different (P < 0.05)?	No						0.950213		4.87551
							4.13603		5.86239
ANOVA table	SS	DF	MS	F (DFn, DFd)	P value		1.96292		5.39038
Treatment (between columns)	14.23	2	7.114	F (2, 68) = 2.473	P=0.0919		3.7384		3.25747
Residual (within columns)	195.6	68	2.877				2.20844		2.60639
Total	209.9	70					9.14917		0
							2.56716		2.44874
Data summary							2.64551		2.00424
Number of treatments (columns)	3						2.04539
Number of values (total)	71

## Sheet: FIG3 IL-4
Table Analyzed	IL-4						w/w	RH/w	RH/RH
Data sets analyzed	A-C						0	0	0.049142
							0	0	0.506359
ANOVA summary							0.807199	0	1.66165
F	2.504						0	0	0.509942
P value	0.0893						0.004756	0	0
P value summary	ns						0.004756	0	0
Significant diff. among means (P < 0.05)?	No						0.770183	0	0
R squared	0.0686						0.340743	0	0
							0.161975	0	0
Brown-Forsythe test							0	0.46307	0
F (DFn, DFd)	2.504 (2, 68)						0	0.157749	0
P value	0.0893						0	0	0
P value summary	ns						0	0	0
Are SDs significantly different (P < 0.05)?	No						0	0	0.279208
							0	0	0
Bartlett's test							0	0	0
Bartlett's statistic (corrected)	23.53						0		0.267463
P value	<0.0001						0		0.37839
P value summary	****						0		0.279208
Are SDs significantly different (P < 0.05)?	Yes						0		1.14365
							0		0
ANOVA table	SS	DF	MS	F (DFn, DFd)	P value		0		0.31787
Treatment (between columns)	0.4041	2	0.2021	F (2, 68) = 2.504	P=0.0893		0		0
Residual (within columns)	5.487	68	0.0807				0		0
Total	5.892	70					0.227753		0
							0		0
Data summary							0		0.502772
Number of treatments (columns)	3						0
Number of values (total)	71

## Sheet: FIG3 IL-5
Table Analyzed	IL-5						w/w	RH/w	RH/RH
Data sets analyzed	A-C						0	0	6.49679
							0	0	3.02854
ANOVA summary							0	4.6932	7.13481
F	3.489						0	2.84976	8.73275
P value	0.0361						0	0	0
P value summary	*						3.36795	0	0
Significant diff. among means (P < 0.05)?	Yes						5.39755	0	0
R squared	0.09307						11.791	3.76462	2.04849
							0	0	0
Brown-Forsythe test							0	3.91617	2.75772
F (DFn, DFd)	1.066 (2, 68)						0	3.52992	0.771165
P value	0.35						1.9348	6.49679	3.9906
P value summary	ns						0	0	0
Are SDs significantly different (P < 0.05)?	No						1.56521	0.771165	3.28515
							3.9906	0	5.21134
Bartlett's test							4.95646	0	5.57987
Bartlett's statistic (corrected)	1.422						0		6.10614
P value	0.491						0.9614		5.63983
P value summary	ns						0		4.6932
Are SDs significantly different (P < 0.05)?	No						2.46934		8.40972
							0		0
ANOVA table	SS	DF	MS	F (DFn, DFd)	P value		3.9906		5.33592
Treatment (between columns)	50.49	2	25.25	F (2, 68) = 3.489	P=0.0361		3.68741		7.39041
Residual (within columns)	492.1	68	7.236				4.89147		0
Total	542.6	70					0		0
							2.84976		3.36795
Data summary							0		4.75985
Number of treatments (columns)	3						0.545628
Number of values (total)	71
Number of families	1
Number of comparisons per family	3
Alpha	0.05
Tukey's multiple comparisons test	Mean Diff.	95.00% CI of diff.	Significant?	Summary	Adjusted P Value
w/w vs. RH/w	0.245	-1.775 to 2.265	No	ns	0.9545	A-B
w/w vs. RH/RH	-1.638	-3.376 to 0.1010	No	ns	0.069	A-C
RH/w vs. RH/RH	-1.883	-3.916 to 0.1510	No	ns	0.0753	B-C
Test details	Mean 1	Mean 2	Mean Diff.	SE of diff.	n1	n2	q	DF
w/w vs. RH/w	1.871	1.626	0.245	0.843	28	16	0.4111	68
w/w vs. RH/RH	1.871	3.509	-1.638	0.7256	28	27	3.192	68
RH/w vs. RH/RH	1.626	3.509	-1.883	0.8487	16	27	3.137	68

## Sheet: Fig3 IL-6
Table Analyzed	IL-6						w/w	RH/w	RH/RH
Data sets analyzed	A-C						105.012	100.558	72.5306
							0	90.6988	79.8391
ANOVA summary							20.8992	123.555	121.8
F	9.016						47.347	112.106	107.677
P value	0.0003						32.8762	68.8533	225.922
P value summary	***						59.5848	88.8968	155.685
Significant diff. among means (P < 0.05)?	Yes						83.4721	59.5848	95.1908
R squared	0.2096						87.9947	56.7812	128.809
							79.8391	57.717	91.5987
Brown-Forsythe test							45.4419	62.3773	93.3962
F (DFn, DFd)	3.698 (2, 68)						56.7812	89.7982	129.683
P value	0.0299						46.3953	125.308	156.545
P value summary	*						58.6515	86.188	151.378
Are SDs significantly different (P < 0.05)?	Yes						45.4419	86.188	96.087
							74.3633	82.5651	100.558
Bartlett's test							72.5306	82.5651	77.1053
Bartlett's statistic (corrected)	14.32						98.7715		116.52
P value	0.0008						107.677		78.0175
P value summary	***						97.8774		85.2835
Are SDs significantly different (P < 0.05)?	Yes						72.5306		136.656
							55.8441		230.089
ANOVA table	SS	DF	MS	F (DFn, DFd)	P value		57.717		131.429
Treatment (between columns)	23638	2	11819	F (2, 68) = 9.016	P=0.0003		95.1908		99.665
Residual (within columns)	89144	68	1311				96.087		46.3953
Total	112782	70					109.45		3.7237
							78.0175		55.8441
Data summary							85.2835		143.6
Number of treatments (columns)	3						96.9825
Number of values (total)	71
Number of families	1
Number of comparisons per family	3
Alpha	0.05
Tukey's multiple comparisons test	Mean Diff.	95.00% CI of diff.	Significant?	Summary	Adjusted P Value
w/w vs. RH/w	-15.57	-42.76 to 11.62	No	ns	0.361	A-B
w/w vs. RH/RH	-41.23	-64.63 to -17.83	Yes	***	0.0002	A-C
RH/w vs. RH/RH	-25.66	-53.03 to 1.710	No	ns	0.0707	B-C
Test details	Mean 1	Mean 2	Mean Diff.	SE of diff.	n1	n2	q	DF
w/w vs. RH/w	70.29	85.86	-15.57	11.35	28	16	1.941	68
w/w vs. RH/RH	70.29	111.5	-41.23	9.766	28	27	5.971	68
RH/w vs. RH/RH	85.86	111.5	-25.66	11.42	16	27	3.177	68

## Sheet: FIG3 CXCL1
Table Analyzed	KC-GRO						w/w	RH/w	RH/RH
Data sets analyzed	A-C						21.1753	21.7171	24.4804
							17.3617	17.2012	26.275
ANOVA summary							21.8046	21.2546	21.5088
F	1.847						25.3271	21.3713	22.8772
P value	0.1656						19.5699	17.598	76.612
P value summary	ns						17.6318	13.5292	31.3485
Significant diff. among means (P < 0.05)?	No						12.7258	28.7589	17.2308
R squared	0.05151						20.0264	19.5532	18.802
							33.39	27.8983	19.4651
Brown-Forsythe test							20.1896	22.4286	15.5656
F (DFn, DFd)	2.032 (2, 68)						18.6886	21.5672	26.9661
P value	0.1389						19.012	30.5371	21.2671
P value summary	ns						18.5751	23.3211	28.3616
Are SDs significantly different (P < 0.05)?	No						33.1626	22.9187	18.4868
							31.5766	19.5616	27.2989
Bartlett's test							26.3614	22.3371	52.0071
Bartlett's statistic (corrected)	24.94						20.6995		28.3452
P value	<0.0001						20.7956		19.528
P value summary	****						20.2774		18.3984
Are SDs significantly different (P < 0.05)?	Yes						46.0348		27.1757
							20.8749		16.4863
ANOVA table	SS	DF	MS	F (DFn, DFd)	P value		22.6945		54.9735
Treatment (between columns)	340.1	2	170	F (2, 68) = 1.847	P=0.1656		26.9373		15.9139
Residual (within columns)	6261	68	92.08				16.0158		24.8936
Total	6601	70					25.6694		27.8121
							24.716		25.1868
Data summary							25.3642		24.5093
Number of treatments (columns)	3						19.6496
Number of values (total)	71

## Sheet: FIG3 TNF-alpha
Table Analyzed	TNFa						w/w	RH/w	RH/RH
Data sets analyzed	A-C						0	0.673771	0.309032
							0	0.691354	0.625251
ANOVA summary							0.364407	0.951834	0.419208
F	9.72						0.304388	0.869951	0.527407
P value	0.0002						0.295086	0.691354	1.70419
P value summary	***						0.396438	0.726429	1.64219
Significant diff. among means (P < 0.05)?	Yes						0.322936	0.695745	1.02469
R squared	0.2223						0.455467	0.730805	1.40505
							0.549747	0.757024	0.743922
Brown-Forsythe test							0.290427	0.437363	0.813622
F (DFn, DFd)	4.394 (2, 68)						0.167132	0.839652	1.12694
P value	0.016						0.428293	0.56312	1.1057
P value summary	*						0.295086	0.527407	1.65874
Are SDs significantly different (P < 0.05)?	Yes						0.66937	0.660563	0.695745
							0.48703	1.56342	0.558665
Bartlett's test							0.522932	0.4645	0.572024
Bartlett's statistic (corrected)	21.41						0.378158		0.414661
P value	<0.0001						0.848317		0.382733
P value summary	****						0.686961		0.558665
Are SDs significantly different (P < 0.05)?	Yes						0.603113		0.704521
							0.336798		2.65849
ANOVA table	SS	DF	MS	F (DFn, DFd)	P value		0.469012		1.23279
Treatment (between columns)	2.859	2	1.429	F (2, 68) = 9.720	P=0.0002		0.616402		0.634092
Residual (within columns)	10	68	0.1471				0.691354		1.22857
Total	12.86	70					0.848317		0.396438
							0.355221		0.743922
Data summary							0.536351		0.713289
Number of treatments (columns)	3						0.921725
Number of values (total)	71
Number of families	1
Number of comparisons per family	3
Alpha	0.05
Tukey's multiple comparisons test	Mean Diff.	95.00% CI of diff.	Significant?	Summary	Adjusted P Value
w/w vs. RH/w	-0.2817	-0.5696 to 0.006282	No	ns	0.0565	A-B
w/w vs. RH/RH	-0.4525	-0.7004 to -0.2047	Yes	***	0.0001	A-C
RH/w vs. RH/RH	-0.1709	-0.4608 to 0.1190	No	ns	0.3403	B-C
Test details	Mean 1	Mean 2	Mean Diff.	SE of diff.	n1	n2	q	DF
w/w vs. RH/w	0.4586	0.7403	-0.2817	0.1202	28	16	3.315	68
w/w vs. RH/RH	0.4586	0.9111	-0.4525	0.1034	28	27	6.187	68
RH/w vs. RH/RH	0.7403	0.9111	-0.1709	0.121	16	27	1.997	68
