# Supplementary material for: Microglia TREM2R47H Alzheimer-linked variant enhances excitatory transmission and reduces LTP via increased TNF-α levels
Source: eLife. 2020 Jun 24;9:e57513. doi: 10.7554/eLife.57513 (PMC7338048; doi:10.7554/eLife.57513)
Supplement: Figure 4—source data 1. [file elife-57513-fig4-data1.xlsx]

## Sheet: FIG4 A
Unpaired T test							w/w	RH/RH
Table Analyzed	Isolated MG Treml1/GAPDH						0.00618	0.0098
							0.0144	0.00913
Column B	RH/RH						0.0144	0.0139
vs.	vs.						0.0154	0.011
Column A	w/w
Unpaired t test
P value	0.5198
P value summary	ns
Significantly different (P < 0.05)?	No
One- or two-tailed P value?	Two-tailed
t, df	t=0.6835, df=6
How big is the difference?
Mean of column A	0.0126
Mean of column B	0.01096
Difference between means (B - A) ± SEM	-0.001638 ± 0.002396
95% confidence interval	-0.007500 to 0.004225
R squared (eta squared)	0.07224
F test to compare variances
F, DFn, Dfd	4.163, 3, 3
P value	0.272
P value summary	ns
Significantly different (P < 0.05)?	No
Data analyzed
Sample size, column A	4
Sample size, column B	4

## Sheet: Fig4 B
Ordinary One-way Anova							w/w	RH/w	RH/RH
Table Analyzed	Hemi Treml1/GAPDH grouped						0.00187	0.00643	0.000313
Data sets analyzed	A-C						0.00283	0.0027	0.0032
							0.00546	0.0028	0.00312
ANOVA summary							0.00337	0.00278	0.00247
F	1.94						0.00359	0.00352	0.00269
P value	0.1632						0.00377	0.00259	0.00248
P value summary	ns						0.00402	0.00306	0.00306
Significant diff. among means (P < 0.05)?	No						0.00386	0.00318	0.00337
R squared	0.1257						0.00343	0.00378	0.00371
							0.00354	0.00534	0.00346
Brown-Forsythe test
F (DFn, DFd)	0.2938 (2, 27)
P value	0.7478
P value summary	ns
Are SDs significantly different (P < 0.05)?	No
Bartlett's test
Bartlett's statistic (corrected)	1.209
P value	0.5464
P value summary	ns
Are SDs significantly different (P < 0.05)?	No
ANOVA table	SS	DF	MS	F (DFn, DFd)	P value
Treatment (between columns)	4.37e-06	2	2.185e-06	F (2, 27) = 1.940	P=0.1632
Residual (within columns)	3.041e-05	27	1.126e-06
Total	3.477e-05	29
Data summary
Number of treatments (columns)	3
Number of values (total)	30
