# Supplementary material for: Microglia TREM2R47H Alzheimer-linked variant enhances excitatory transmission and reduces LTP via increased TNF-α levels
Source: eLife. 2020 Jun 24;9:e57513. doi: 10.7554/eLife.57513 (PMC7338048; doi:10.7554/eLife.57513)
Supplement: Figure 5—source data 1. [file elife-57513-fig5-data1.xlsx]

## Sheet: FIG5 B
Table Analyzed	amplitude						w/w	RH/w	RH/RH
Data sets analyzed	A-C						7.5388	9.23588	9.74225
							9.29347	13.1552	12.6619
ANOVA summary							6.95953	16.6419	12.4376
F	7.371						12.8015	14.0411	16.5184
P value	0.0025						11.2626	7.29346	14.0612
P value summary	**						11.9219	13.0835	12.198
Significant diff. among means (P < 0.05)?	Yes						7.23744	12.4541	19.9936
R squared	0.3295						7.93051	12.2478	15.6251
							7.20443	11.7792	12.0565
Brown-Forsythe test							9.6868	10.9216	11.161
F (DFn, DFd)	0.1982 (2, 30)						9.75663	10.5597
P value	0.8213							6.95516
P value summary	ns
Are SDs significantly different (P < 0.05)?	No
Bartlett's test
Bartlett's statistic (corrected)	1.368
P value	0.5046
P value summary	ns
Are SDs significantly different (P < 0.05)?	No
ANOVA table	SS	DF	MS	F (DFn, DFd)	P value
Treatment (between columns)	102.2	2	51.08	F (2, 30) = 7.371	P=0.0025
Residual (within columns)	207.9	30	6.929
Total	310	32
Data summary
Number of treatments (columns)	3
Number of values (total)	33
Number of families	1
Number of comparisons per family	3
Alpha	0.05
Tukey's multiple comparisons test	Mean Diff.	95.00% CI of diff.	Significant?	Summary	Adjusted P Value
w/w vs. RH/w	-2.295	-5.004 to 0.4139	No	ns	0.1093	A-B
w/w vs. RH/RH	-4.41	-7.245 to -1.574	Yes	**	0.0017	A-C
RH/w vs. RH/RH	-2.115	-4.893 to 0.6638	No	ns	0.163	B-C
Test details	Mean 1	Mean 2	Mean Diff.	SE of diff.	n1	n2	q	DF
w/w vs. RH/w	9.236	11.53	-2.295	1.099	11	12	2.954	30
w/w vs. RH/RH	9.236	13.65	-4.41	1.15	11	10	5.422	30
RH/w vs. RH/RH	11.53	13.65	-2.115	1.127	12	10	2.654	30

## Sheet: Fig5 C
Table Analyzed	decay						w/w	RH/w	RH/RH
Data sets analyzed	A-C						16.4825	17.0609	18.3772
							22.0703	13.1785	19.9953
ANOVA summary							14.5779	18.7034	16.9087
F	1.396						18.648	19.5372	7.97234
P value	0.2632						17.2118	9.0347	6.336
P value summary	ns						20.0833	15.5289	9.72106
Significant diff. among means (P < 0.05)?	No						12.1069	13.9776	13.8316
R squared	0.08514						9.77394	17.467	12.0097
							16.9628	12.0987	20.2345
Brown-Forsythe test							18.3565	15.9618	17.8035
F (DFn, DFd)	1.731 (2, 30)						18.9044	8.89784
P value	0.1943							9.64153
P value summary	ns
Are SDs significantly different (P < 0.05)?	No
Bartlett's test
Bartlett's statistic (corrected)	1.478
P value	0.4775
P value summary	ns
Are SDs significantly different (P < 0.05)?	No
ANOVA table	SS	DF	MS	F (DFn, DFd)	P value
Treatment (between columns)	47.67	2	23.83	F (2, 30) = 1.396	P=0.2632
Residual (within columns)	512.2	30	17.07
Total	559.9	32
Data summary
Number of treatments (columns)	3
Number of values (total)	33

## Sheet: FIG5 D
Table Analyzed	frequency						w/w	RH/w	RH/RH
Data sets analyzed	A-C						0.596667	0.673333	1.36
							0.9	0.82	1.32
ANOVA summary							0.56	0.943333	0.723333
F	7.092						0.756667	0.92	1.34333
P value	0.003						0.646667	0.65	1.39333
P value summary	**						0.736667	0.743333	0.693333
Significant diff. among means (P < 0.05)?	Yes						0.9	0.943333	1.07667
R squared	0.321						0.62	1.23333	0.893333
							0.92	0.820833	0.72
Brown-Forsythe test							0.466667	0.675	0.98
F (DFn, DFd)	4.470 (2, 30)						0.743333	0.596667
P value	0.02							0.753333
P value summary	*
Are SDs significantly different (P < 0.05)?	Yes
Bartlett's test
Bartlett's statistic (corrected)	4.424
P value	0.1095
P value summary	ns
Are SDs significantly different (P < 0.05)?	No
ANOVA table	SS	DF	MS	F (DFn, DFd)	P value
Treatment (between columns)	0.6219	2	0.3109	F (2, 30) = 7.092	P=0.0030
Residual (within columns)	1.315	30	0.04384
Total	1.937	32
Data summary
Number of treatments (columns)	3
Number of values (total)	33
Number of families	1
Number of comparisons per family	3
Alpha	0.05
Tukey's multiple comparisons test	Mean Diff.	95.00% CI of diff.	Significant?	Summary	Adjusted P Value
w/w vs. RH/w	-0.101	-0.3165 to 0.1144	No	ns	0.4881	A-B
w/w vs. RH/RH	-0.337	-0.5625 to -0.1115	Yes	**	0.0025	A-C
RH/w vs. RH/RH	-0.236	-0.4570 to -0.01494	Yes	*	0.0345	B-C
Test details	Mean 1	Mean 2	Mean Diff.	SE of diff.	n1	n2	q	DF
w/w vs. RH/w	0.7133	0.8144	-0.101	0.0874	11	12	1.635	30
w/w vs. RH/RH	0.7133	1.05	-0.337	0.09149	11	10	5.209	30
RH/w vs. RH/RH	0.8144	1.05	-0.236	0.08965	12	10	3.722	30

## Sheet: FIG5 H
Table Analyzed	ampa/nmda						w/w	RH/w	RH/RH
Data sets analyzed	A-C						1.21996	2.89435	3.15923
							1.83248	2.08903	2.21407
ANOVA summary							1.23942	2.80157	2.17572
F	11.75						1.62646	2.28499	2.24526
P value	0.0002						1.48178	1.89478	2.2303
P value summary	***						1.92174	1.48546	3.0815
Significant diff. among means (P < 0.05)?	Yes						1.74118	1.80852	2.62371
R squared	0.4654						1.96346	2.61073	2.92043
							2.3756	2.40306	3.13767
Brown-Forsythe test							1.5537	1.86039	2.21384
F (DFn, DFd)	0.8846 (2, 27)
P value	0.4245
P value summary	ns
Are SDs significantly different (P < 0.05)?	No
Bartlett's test
Bartlett's statistic (corrected)	0.6878
P value	0.709
P value summary	ns
Are SDs significantly different (P < 0.05)?	No
ANOVA table	SS	DF	MS	F (DFn, DFd)	P value
Treatment (between columns)	4.12	2	2.06	F (2, 27) = 11.75	P=0.0002
Residual (within columns)	4.733	27	0.1753
Total	8.853	29
Data summary
Number of treatments (columns)	3
Number of values (total)	30
Number of families	1
Number of comparisons per family	3
Alpha	0.05
Tukey's multiple comparisons test	Mean Diff.	95.00% CI of diff.	Significant?	Summary	Adjusted P Value
w/w vs. RH/w	-0.5177	-0.9819 to -0.05348	Yes	*	0.0265	A-B
w/w vs. RH/RH	-0.9046	-1.369 to -0.4404	Yes	***	0.0001	A-C
RH/w vs. RH/RH	-0.3869	-0.8511 to 0.07734	No	ns	0.116	B-C
Test details	Mean 1	Mean 2	Mean Diff.	SE of diff.	n1	n2	q	DF
w/w vs. RH/w	1.696	2.213	-0.5177	0.1872	10	10	3.91	27
w/w vs. RH/RH	1.696	2.6	-0.9046	0.1872	10	10	6.833	27
RH/w vs. RH/RH	2.213	2.6	-0.3869	0.1872	10	10	2.922	27

## Sheet: FIG5 I 
Table Analyzed	PPF 50ms					PPF 50ms	w/w	RH/w	RH/RH
Data sets analyzed	A-C						1.70392	1.90483	2.12426
							1.90998	1.65404	1.55027
ANOVA summary							1.70511	2.00119	1.61116
F	0.09495						1.8251	1.54026	1.73772
P value	0.9096						1.90071	1.7598	1.40881
P value summary	ns						1.51232	1.83935	1.68808
Significant diff. among means (P < 0.05)?	No						1.35185	1.54869	1.62716
R squared	0.003861						1.74146	1.56714	1.54638
							1.59532	1.73538	1.85137
Brown-Forsythe test							1.85149	1.69851	2.09194
F (DFn, DFd)	0.5969 (2, 49)						1.67091	1.88578	1.49495
P value	0.5545						1.62704	1.88473	1.7243
P value summary	ns						1.86617	1.61696	1.73341
Are SDs significantly different (P < 0.05)?	No						1.80923	1.65909	1.74274
							2.02953	1.7583	1.86436
Bartlett's test							1.63216	1.80186
Bartlett's statistic (corrected)	2.351						1.89965	1.79208
P value	0.3086						1.83479
P value summary	ns						1.76846
Are SDs significantly different (P < 0.05)?	No						1.55889
ANOVA table	SS	DF	MS	F (DFn, DFd)	P value
Treatment (between columns)	0.005281	2	0.00264	F (2, 49) = 0.09495	P=0.9096
Residual (within columns)	1.363	49	0.02781
Total	1.368	51
Data summary
Number of treatments (columns)	3
Number of values (total)	52
Table Analyzed	PPF 200ms					PPF 200ms	w/w	RH/w	RH/RH
Data sets analyzed	A-C						1.23572	1.04997	1.36574
							1.24138	1.2433	1.36285
ANOVA summary							1.05684	1.22882	1.17156
F	0.1397						1.16135	0.989028	1.17476
P value	0.87						1.27749	1.30401	1.21469
P value summary	ns						1.12157	1.21551	1.08052
Significant diff. among means (P < 0.05)?	No						1.24383	1.35269	1.26008
R squared	0.005668						1.25424	1.23031	1.21048
							1.26566	1.21749	1.33612
Brown-Forsythe test							1.31744	1.14062	1.46912
F (DFn, DFd)	1.766 (2, 49)						1.17368	1.22855	1.03883
P value	0.1817						1.07427	1.34162	0.996729
P value summary	ns						1.20835	1.2564	1.16436
Are SDs significantly different (P < 0.05)?	No						1.26537	1.01639	1.17873
							1.30425	1.38829	1.32806
Bartlett's test							1.2228	1.17429
Bartlett's statistic (corrected)	4.348						1.29841	1.20871
P value	0.1137						1.27614
P value summary	ns						1.35824
Are SDs significantly different (P < 0.05)?	No						1.22991
ANOVA table	SS	DF	MS	F (DFn, DFd)	P value
Treatment (between columns)	0.003186	2	0.001593	F (2, 49) = 0.1397	P=0.8700
Residual (within columns)	0.559	49	0.01141
Total	0.5622	51
Data summary
Number of treatments (columns)	3
Number of values (total)	52
