# Supplementary material for: Microglia TREM2R47H Alzheimer-linked variant enhances excitatory transmission and reduces LTP via increased TNF-α levels
Source: eLife. 2020 Jun 24;9:e57513. doi: 10.7554/eLife.57513 (PMC7338048; doi:10.7554/eLife.57513)
Supplement: Figure 6—source data 1. [file elife-57513-fig6-data1.xlsx]

## Sheet: FIG6 B
Table Analyzed	amplitude						w/w + anti-TNFα	RH/RH + anti-TNFα	RH/RH + Isotype	w/w + Isotype
Data sets analyzed	A-D						9.58174	5.5079	9.00803	6.71213
							7.61681	8.81846	14.5802	6.98492
ANOVA summary							10.1237	8.6552	16.1538	5.64924
F	18.79						9.96004	7.66189	14.5523	6.06939
P value	<0.0001						7.93039	8.48026	12.952	5.81797
P value summary	****						9.64417	7.47158	9.58723	6.94249
Significant diff. among means (P < 0.05)?	Yes						6.63501	12.6328	10.4016	8.42651
R squared	0.5107						7.59386	7.33894	24.0598	5.79067
							7.43563	10.774	19.1307	5.6828
Brown-Forsythe test							8.4007	10.2687	15.2066	9.86397
F (DFn, DFd)	4.855 (3, 54)						7.69623	8.36514	12.2274	9.46275
P value	0.0046						6.94427	8.86641	10.8799	7.33307
P value summary	**						6.8837	12.9787	17.1737	9.88016
Are SDs significantly different (P < 0.05)?	Yes						9.67631	7.93427	15.5402	9.87786
							4.94164		8.18246
Bartlett's test
Bartlett's statistic (corrected)	20.09
P value	0.0002
P value summary	***
Are SDs significantly different (P < 0.05)?	Yes
ANOVA table	SS	DF	MS	F (DFn, DFd)	P value
Treatment (between columns)	391.2	3	130.4	F (3, 54) = 18.79	P<0.0001
Residual (within columns)	374.8	54	6.941
Total	766	57
Data summary
Number of treatments (columns)	4
Number of values (total)	58
Number of families	1
Number of comparisons per family	6
Alpha	0.05
Tukey's multiple comparisons test	Mean Diff.	95.00% CI of diff.	Significant?	Summary	Adjusted P Value
w/w + anti-TNFα vs. RH/RH + anti-TNFα	-0.9115	-3.507 to 1.684	No	ns	0.7884	A-B
w/w + anti-TNFα vs. RH/RH + Isotype	-5.905	-8.455 to -3.355	Yes	****	<0.0001	A-C
w/w + anti-TNFα vs. w/w + Isotype	0.6071	-1.988 to 3.202	No	ns	0.9252	A-D
RH/RH + anti-TNFα vs. RH/RH + Isotype	-4.993	-7.589 to -2.398	Yes	****	<0.0001	B-C
RH/RH + anti-TNFα vs. w/w + Isotype	1.519	-1.121 to 4.158	No	ns	0.4299	B-D
RH/RH + Isotype vs. w/w + Isotype	6.512	3.917 to 9.107	Yes	****	<0.0001	C-D
Test details	Mean 1	Mean 2	Mean Diff.	SE of diff.	n1	n2	q	DF
w/w + anti-TNFα vs. RH/RH + anti-TNFα	8.071	8.982	-0.9115	0.979	15	14	1.317	54
w/w + anti-TNFα vs. RH/RH + Isotype	8.071	13.98	-5.905	0.962	15	15	8.681	54
w/w + anti-TNFα vs. w/w + Isotype	8.071	7.464	0.6071	0.979	15	14	0.877	54
RH/RH + anti-TNFα vs. RH/RH + Isotype	8.982	13.98	-4.993	0.979	14	15	7.213	54
RH/RH + anti-TNFα vs. w/w + Isotype	8.982	7.464	1.519	0.9958	14	14	2.157	54
RH/RH + Isotype vs. w/w + Isotype	13.98	7.464	6.512	0.979	15	14	9.406	54

## Sheet: Fig6 C
Table Analyzed	decay						w/w + anti-TNFα	RH/RH + anti-TNFα	RH/RH + Isotype	w/w + Isotype
Data sets analyzed	A-D						13.4133	16.1928	16.6068	10.6564
							11.6157	21.9668	19.0293	13.4588
ANOVA summary							12.5708	16.0364	20.4903	11.3808
F	2.716						12.8968	15.0156	20.2606	12.2769
P value	0.0536						19.3831	17.7776	20.9782	13.1289
P value summary	ns						11.971	13.3235	20.5247	16.4528
Significant diff. among means (P < 0.05)?	No						13.9378	17.7511	19.6012	17.3342
R squared	0.1311						11.8326	14.8338	16.3048	11.89
							11.8248	18.3653	12.8512	11.1205
Brown-Forsythe test							11.4482	10.7875	12.6784	12.6362
F (DFn, DFd)	0.7973 (3, 54)						17.4274	19.5557	9.18867	12.0543
P value	0.5008						14.6574	14.3301	11.5738	18.8694
P value summary	ns						16.7694	18.6826	16.7385	19.7889
Are SDs significantly different (P < 0.05)?	No						9.19214	11.9851	15.5379	20.6662
							8.97008		10.1968
Bartlett's test
Bartlett's statistic (corrected)	1.784
P value	0.6184
P value summary	ns
Are SDs significantly different (P < 0.05)?	No
ANOVA table	SS	DF	MS	F (DFn, DFd)	P value
Treatment (between columns)	94.05	3	31.35	F (3, 54) = 2.716	P=0.0536
Residual (within columns)	623.3	54	11.54
Total	717.3	57
Data summary
Number of treatments (columns)	4
Number of values (total)	58

## Sheet: FIG6 D
Table Analyzed	frequency						w/w + anti-TNFα	RH/RH + anti-TNFα	RH/RH + Isotype	w/w + Isotype
Data sets analyzed	A-D						0.943333	0.72	1.13333	0.623333
							0.753333	1.16333	1.38	0.756
ANOVA summary							0.76	1.29333	0.99	0.923333
F	12.05						0.64	0.883333	1.08333	0.826667
P value	<0.0001						0.856667	0.786667	1.44667	0.696667
P value summary	****						0.76	0.856667	1.14	0.856667
Significant diff. among means (P < 0.05)?	Yes						0.75	1.31333	1.54667	0.6
R squared	0.4011						0.746667	1.06	0.966667	0.686667
							0.763333	0.97	0.993333	0.633333
Brown-Forsythe test							0.84	0.97027	0.786667	0.84
F (DFn, DFd)	2.759 (3, 54)						0.5	1.2	0.776667	0.783333
P value	0.051						0.786667	1.05667	0.956667	0.696667
P value summary	ns						0.946667	1.12	0.91	1.14667
Are SDs significantly different (P < 0.05)?	No						0.723333	0.593333	1.18667	0.833333
							0.664		1.08
Bartlett's test
Bartlett's statistic (corrected)	7.971
P value	0.0466
P value summary	*
Are SDs significantly different (P < 0.05)?	Yes
ANOVA table	SS	DF	MS	F (DFn, DFd)	P value
Treatment (between columns)	1.175	3	0.3917	F (3, 54) = 12.05	P<0.0001
Residual (within columns)	1.755	54	0.0325
Total	2.93	57
Data summary
Number of treatments (columns)	4
Number of values (total)	58
Number of families	1
Number of comparisons per family	6
Alpha	0.05
Tukey's multiple comparisons test	Mean Diff.	95.00% CI of diff.	Significant?	Summary	Adjusted P Value
w/w + anti-TNFα vs. RH/RH + anti-TNFα	-0.2368	-0.4144 to -0.05922	Yes	**	0.0046	A-B
w/w + anti-TNFα vs. RH/RH + Isotype	-0.3295	-0.5040 to -0.1550	Yes	****	<0.0001	A-C
w/w + anti-TNFα vs. w/w + Isotype	-0.0165	-0.1941 to 0.1611	No	ns	0.9947	A-D
RH/RH + anti-TNFα vs. RH/RH + Isotype	-0.09271	-0.2703 to 0.08487	No	ns	0.5147	B-C
RH/RH + anti-TNFα vs. w/w + Isotype	0.2203	0.03969 to 0.4009	Yes	*	0.0109	B-D
RH/RH + Isotype vs. w/w + Isotype	0.313	0.1354 to 0.4906	Yes	***	0.0001	C-D
Test details	Mean 1	Mean 2	Mean Diff.	SE of diff.	n1	n2	q	DF
w/w + anti-TNFα vs. RH/RH + anti-TNFα	0.7623	0.9991	-0.2368	0.06699	15	14	4.999	54
w/w + anti-TNFα vs. RH/RH + Isotype	0.7623	1.092	-0.3295	0.06582	15	15	7.08	54
w/w + anti-TNFα vs. w/w + Isotype	0.7623	0.7788	-0.0165	0.06699	15	14	0.3482	54
RH/RH + anti-TNFα vs. RH/RH + Isotype	0.9991	1.092	-0.09271	0.06699	14	15	1.957	54
RH/RH + anti-TNFα vs. w/w + Isotype	0.9991	0.7788	0.2203	0.06813	14	14	4.573	54
RH/RH + Isotype vs. w/w + Isotype	1.092	0.7788	0.313	0.06699	15	14	6.608	54

## Sheet: FIG6 H
Table Analyzed	ampa/nmda						w/w + anti-TNFα	RH/RH + anti-TNFα	RH/RH + Isotype	w/w + Isotype
Data sets analyzed	A-D						1.83338	2.16354	2.41223	2.27326
							2.12754	2.07754	2.29672	1.82448
ANOVA summary							2.16816	1.47239	2.94223	1.86834
F	13.5						1.87882	2.13236	3.17955	2.32396
P value	<0.0001						2.04227	1.8021	3.04	1.78198
P value summary	****						1.69918	1.82431	2.54458	2.52836
Significant diff. among means (P < 0.05)?	Yes						1.71166	2.08015	2.15847	1.59803
R squared	0.5293						1.58454	1.49959	2.15588	1.90714
							1.6936	2.21152	2.63343	2.1268
Brown-Forsythe test							1.29203	2.1084
F (DFn, DFd)	0.8123 (3, 36)						1.71546
P value	0.4955						1.70122
P value summary	ns
Are SDs significantly different (P < 0.05)?	No
Bartlett's test
Bartlett's statistic (corrected)	1.978
P value	0.577
P value summary	ns
Are SDs significantly different (P < 0.05)?	No
ANOVA table	SS	DF	MS	F (DFn, DFd)	P value
Treatment (between columns)	3.638	3	1.213	F (3, 36) = 13.50	P<0.0001
Residual (within columns)	3.235	36	0.08986
Total	6.873	39
Data summary
Number of treatments (columns)	4
Number of values (total)	40
Number of families	1
Number of comparisons per family	6
Alpha	0.05
Tukey's multiple comparisons test	Mean Diff.	95.00% CI of diff.	Significant?	Summary	Adjusted P Value
w/w + anti-TNFα vs. RH/RH + anti-TNFα	-0.1499	-0.4955 to 0.1958	No	ns	0.6507	A-B
w/w + anti-TNFα vs. RH/RH + Isotype	-0.8086	-1.165 to -0.4526	Yes	****	<0.0001	A-C
w/w + anti-TNFα vs. w/w + Isotype	-0.2385	-0.5945 to 0.1175	No	ns	0.288	A-D
RH/RH + anti-TNFα vs. RH/RH + Isotype	-0.6587	-1.030 to -0.2878	Yes	***	0.0002	B-C
RH/RH + anti-TNFα vs. w/w + Isotype	-0.08863	-0.4596 to 0.2823	No	ns	0.9171	B-D
RH/RH + Isotype vs. w/w + Isotype	0.5701	0.1895 to 0.9507	Yes	**	0.0015	C-D
Test details	Mean 1	Mean 2	Mean Diff.	SE of diff.	n1	n2	q	DF
w/w + anti-TNFα vs. RH/RH + anti-TNFα	1.787	1.937	-0.1499	0.1284	12	10	1.651	36
w/w + anti-TNFα vs. RH/RH + Isotype	1.787	2.596	-0.8086	0.1322	12	9	8.651	36
w/w + anti-TNFα vs. w/w + Isotype	1.787	2.026	-0.2385	0.1322	12	9	2.552	36
RH/RH + anti-TNFα vs. RH/RH + Isotype	1.937	2.596	-0.6587	0.1377	10	9	6.763	36
RH/RH + anti-TNFα vs. w/w + Isotype	1.937	2.026	-0.08863	0.1377	10	9	0.91	36
RH/RH + Isotype vs. w/w + Isotype	2.596	2.026	0.5701	0.1413	9	9	5.705	36

## Sheet: FIG6 I 
Table Analyzed	PPF 50ms					PPF 50ms	w/w + anti-TNFα	RH/RH + anti-TNFα	RH/RH + Isotype	w/w + Isotype
Data sets analyzed	A-D						1.9537	1.7229	1.57893	2.00133
							1.74768	1.45198	1.41989	1.57962
ANOVA summary							1.90796	1.86016	1.5013	1.74157
F	0.742						1.92127	1.72341	1.94496	1.69578
P value	0.5313						1.36726	1.91414	1.57518	1.81708
P value summary	ns						1.45646	1.97637	1.82518	2.04006
Significant diff. among means (P < 0.05)?	No						1.58758	1.53513	1.65264	1.5395
R squared	0.03696						1.55526	1.66994	1.47849	1.75972
							1.62867	1.41039	1.61095	1.89196
Brown-Forsythe test							2.14633	1.93388	1.51028	1.67827
F (DFn, DFd)	0.4548 (3, 58)						1.95934	1.62009	1.63801	1.65876
P value	0.7149						1.51511	1.79297	1.93189	2.09071
P value summary	ns						1.9442	2.0198	1.94729	1.85862
Are SDs significantly different (P < 0.05)?	No						2.06618		1.57292	1.8905
							1.79932		2.16932
Bartlett's test							1.49104
Bartlett's statistic (corrected)	1.324						1.69491
P value	0.7235						1.65521
P value summary	ns						1.71794
Are SDs significantly different (P < 0.05)?	No						1.45805
ANOVA table	SS	DF	MS	F (DFn, DFd)	P value
Treatment (between columns)	0.09502	3	0.03167	F (3, 58) = 0.7420	P=0.5313
Residual (within columns)	2.476	58	0.04268
Total	2.571	61
Data summary
Number of treatments (columns)	4
Number of values (total)	62
Table Analyzed	PPF 200ms
Data sets analyzed	A-D					PPF 200ms	w/w + anti-TNFα	RH/RH + anti-TNFα	RH/RH + Isotype	w/w + Isotype
							1.12183	1.17606	1.01158	1.22958
ANOVA summary							1.06777	1.05607	1.02296	1.25242
F	2.356						1.3465	1.09986	1.10937	1.2477
P value	0.0812						1.18563	1.12328	1.04579	1.23591
P value summary	ns						1.10085	1.3016	1.12974	1.20321
Significant diff. among means (P < 0.05)?	No						1.06784	1.17926	1.07494	1.45022
R squared	0.1086						1.12819	1.07526	1.15459	1.04123
							1.18973	1.07957	1.00127	1.18798
Brown-Forsythe test							1.09147	1.07838	1.29022	1.30819
F (DFn, DFd)	0.08719 (3, 58)						1.51227	1.31676	1.12649	1.08059
P value	0.9668						1.1926	1.16249	1.02091	1.09007
P value summary	ns						1.17223	1.14167	1.13661	1.27116
Are SDs significantly different (P < 0.05)?	No						1.06599	1.30247	1.21684	1.14546
							1.26844		1.14238	1.38816
Bartlett's test							1.25269		1.32801
Bartlett's statistic (corrected)	0.7548						1.18554
P value	0.8602						1.08997
P value summary	ns						1.19751
Are SDs significantly different (P < 0.05)?	No						1.18963
							1.05384
ANOVA table	SS	DF	MS	F (DFn, DFd)	P value
Treatment (between columns)	0.07809	3	0.02603	F (3, 58) = 2.356	P=0.0812
Residual (within columns)	0.6409	58	0.01105
Total	0.719	61
Data summary
Number of treatments (columns)	4
Number of values (total)	62
