# Supplementary material for: Microglia TREM2R47H Alzheimer-linked variant enhances excitatory transmission and reduces LTP via increased TNF-α levels
Source: eLife. 2020 Jun 24;9:e57513. doi: 10.7554/eLife.57513 (PMC7338048; doi:10.7554/eLife.57513)
Supplement: Figure 7—source data 1. [file elife-57513-fig7-data1.xlsx]

## Sheet: FIG7 A
Table Analyzed	Input-output intensity 1						w/w	w/w	w/w	w/w	w/w	w/w	w/w	w/w	w/w	w/w	w/w							RH/RH	RH/RH	RH/RH	RH/RH	RH/RH	RH/RH	RH/RH	RH/RH	RH/RH	RH/RH	RH/RH	RH/RH	RH/RH	RH/RH	RH/RH
						0.4	0.0761324	0.03959	0.240283	0.0673333	0.166395	0.114006	0.081169	0.045	0.033324	0.247481	0.0845337							0.104024	0.246471	0.087927	0.285238	0.22285	0.200394	0.109157	0.0907927	0.333169	0.156538	0.138221	0.179147	0.206167	0.142484	0.307798
Two-way RM ANOVA	Matching: Stacked					0.6	0.271103	0.16179	0.470694	0.116498	0.43976	0.270314	0.214053	0.078898	0.085079	0.334124	0.162795							0.195944	0.519076	0.21176	0.337305	0.401131	0.341845	0.397469	0.170847	0.66136	0.563929	0.300505	0.315816	0.325441	0.302776	0.48176
Assume sphericity?	Yes					0.8	0.465064	0.27302	0.66427	0.143526	0.691901	0.358746	0.226391	0.082593	0.178434	0.388409	0.291396							0.311436	0.713905	0.272093	0.373919	0.647544	0.42573	0.603235	0.25593	0.949187	0.844247	0.494619	0.443209	0.462908	0.425242	0.660294
Alpha	0.05					1	0.682682	0.347092	0.784758	0.191498	0.86926	0.340678	0.471827	0.09234	0.269303	0.389436	0.403826							0.427246	0.871118	0.402175	0.404451	0.88797	0.533686	0.691893	0.319289	1.11498	1.17509	0.701665	0.59804	0.569702	0.636832	0.938673
						1.2	0.781176	0.452465	1.01868	0.245151	0.998015	0.360577	0.661114	0.114845	0.214334	0.457008	0.416947							0.511719	0.970734	0.497578	0.463111	1.08427	0.646735	0.925119	0.432243	1.38878	1.40005	0.878322	0.7493	0.732906	0.822701	1.11882
Source of Variation	% of total variation	P value	P value summary	Significant?		1.4	0.854565	0.753063	1.13	0.34038	1.11222	0.343962	0.803131	0.129153	0.30357	0.574104	0.43612							0.580332	1.0575	0.65918	0.508932	1.20108	0.732105	1.19715	0.58396	1.656	1.63792	1.09443	0.883502	0.897827	1.00668	1.35443
Row Factor x Column Factor	2.663	<0.0001	****	Yes		1.6	0.825862	0.903125	1.18098	0.390102	1.29264	0.362307	0.891459	0.13687	0.448314	0.534641	0.41927							0.685378	1.11589	0.845807	0.637336	1.31831	0.820649	1.34771	0.71025	1.74587	1.78496	1.26137	1.03535	1.01573	1.19444	1.52631
Row Factor	40.51	<0.0001	****	Yes
Column Factor	10.64	0.0098	**	Yes
Subject	32.41	<0.0001	****	Yes
ANOVA table	SS	DF	MS	F (DFn, DFd)	P value
Row Factor x Column Factor	0.7447	6	0.1241	F (6, 144) = 6.745	P<0.0001
Row Factor	11.33	6	1.888	F (6, 144) = 102.6	P<0.0001
Column Factor	2.976	1	2.976	F (1, 24) = 7.880	P=0.0098
Subject	9.064	24	0.3777	F (24, 144) = 20.52	P<0.0001
Residual	2.65	144	0.0184
Difference between column means
Mean of w/w	0.4194
Mean of RH/RH	0.6782
Difference between means	-0.2588
SE of difference	0.0922
95% CI of difference	-0.4491 to -0.06853
Data summary
Number of columns (Column Factor)	2
Number of rows (Row Factor)	7
Number of subjects (Subject)	26
Number of missing values	0
Compare each cell mean with the other cell mean in that row
Number of families	1
Number of comparisons per family	7
Alpha	0.05
Sidak's multiple comparisons test	Predicted (LS) mean diff.	95.00% CI of diff.	Significant?	Summary	Adjusted P Value
w/w - RH/RH
0.4	-0.0787	-0.3634 to 0.2060	No	ns	0.9855
0.6	-0.1316	-0.4163 to 0.1530	No	ns	0.8095
0.8	-0.1834	-0.4681 to 0.1013	No	ns	0.4505
1	-0.2446	-0.5293 to 0.04007	No	ns	0.1368
1.2	-0.3215	-0.6061 to -0.03679	Yes	*	0.0175
1.4	-0.387	-0.6717 to -0.1023	Yes	**	0.0021
1.6	-0.4649	-0.7496 to -0.1803	Yes	***	0.0001
Test details	Predicted (LS) mean 1	Predicted (LS) mean 2	Predicted (LS) mean diff.	SE of diff.	N1	N2	t	DF
w/w - RH/RH
0.4	0.1087	0.1874	-0.0787	0.1048	11	15	0.7508	168
0.6	0.2368	0.3685	-0.1316	0.1048	11	15	1.256	168
0.8	0.3422	0.5256	-0.1834	0.1048	11	15	1.75	168
1	0.4402	0.6849	-0.2446	0.1048	11	15	2.334	168
1.2	0.52	0.8415	-0.3215	0.1048	11	15	3.067	168
1.4	0.6164	1.003	-0.387	0.1048	11	15	3.692	168
1.6	0.6714	1.136	-0.4649	0.1048	11	15	4.436	168

## Sheet: Fig7 C
Table Analyzed	LTP1 last 10 mins
						Minutes	w/w	w/w	w/w	w/w	w/w	w/w	w/w	w/w	w/w	w/w	w/w	w/w	w/w		RH/RH	RH/RH	RH/RH	RH/RH	RH/RH	RH/RH	RH/RH	RH/RH	RH/RH	RH/RH	RH/RH	RH/RH	RH/RH	RH/RH	RH/RH	RH/RH	RH/RH	RH/RH	RH/RH	RH/RH	RH/RH	RH/RH
Column B	RH/RH					51	1.13514	1.95155	1.18023	1.72395	1.09973	1.50054	1.88952	1.94564	1.65901	2.25721	1.3828	1.29959	1.76473		1.06473	1.11289	1.27169	0.974322	1.28264	1.18801	1.22951	1.29047	0.972188	1.17835	1.68927	0.916866	1.03105	1.17835	0.97373	0.712936	1.34548	1.60537	0.829162	1.02869	1.3049	0.650395
vs.	vs.					52	1.15158	2.09375	1.2011	1.75996	1.26156	1.60193	1.80638	1.77503	1.69661	2.29253	1.57873	1.4005	1.93621		1.10841	1.0749	1.20082	0.908329	1.01204	1.13767	1.31782	1.29067	1.26707	1.20697	1.47914	1.13876	1.3315	1.03254	1.01821	0.793459	1.43007	1.46432	0.794615	1.05194	1.25665	1.14383
Column A	w/w					53	1.09597	1.98403	1.19648	1.83275	1.21503	1.61011	1.96436	1.69672	1.68742	2.33718	1.45035	1.47769	1.80938		1.07808	1.06455	1.28453	0.871696	1.17314	1.23728	1.33788	1.25829	0.791587	1.18012	1.58998	1.08173	1.15125	0.966291	0.925439	0.841718	1.43007	1.58446	0.76622	1.10263	1.09958	0.654526
						54	1.02543	1.99507	1.19564	2.04075	1.2466	1.65732	2.06281	1.69587	1.67148	2.58657	1.43055	1.27684	2.05515		1.18815	1.10506	1.26442	0.905443	1.04262	1.25285	1.2717	1.23071	0.775265	1.17607	1.58501	1.19143	1.20987	1.07623	1.00469	0.741276	1.55071	1.4881	0.846205	1.11167	1.26314	0.753452
Unpaired t test						55	1.12667	1.94542	1.28127	1.8211	1.21781	1.50019	1.96161	1.73367	1.69029	2.38251	1.47266	1.31025	2.17819		1.11494	1.07431	1.21558	0.957427	1.13976	1.23643	1.36149	1.28672	1.01305	1.1497	1.70955	1.2715	1.2263	1.09337	1.01237	0.693122	1.54058	1.58052	0.773885	1.14516	1.26922	0.819616
P value	<0.0001					56	1.09458	1.92703	1.24432	1.93998	1.26175	1.49716	1.95399	1.92019	1.63778	2.61445	1.47171	1.55069	2.12265		1.17254	1.21432	1.29068	0.930347	0.959925	1.25899	1.28433	1.26008	0.841459	1.16856	1.4874	0.993778	1.20629	1.08257	0.891611	0.829504	1.65443	1.57977	0.793479	1.14659	1.28569	0.842709
P value summary	****					57	1.1168	2.07658	1.2796	1.87886	1.22529	1.56468	1.65068	1.61565	1.63184	2.57043	1.46299	1.59733	1.78074		1.18255	1.01561	1.27296	0.866061	1.20174	1.05561	1.28844	1.27096	0.928941	1.16146	1.54844	1.09989	1.23724	1.0927	0.97169	0.788692	1.5872	1.63065	0.665893	1.07909	1.30865	0.882813
Significantly different (P < 0.05)?	Yes					58	1.10569	1.94664	1.29841	1.70544	1.16346	1.49181	1.94918	1.74682	1.6215	2.73039	1.46498	1.31799	1.96593		1.14296	1.07808	1.31453	0.885043	1.11351	1.09631	1.32032	1.21412	1.03259	1.17758	1.46831	1.24904	1.23216	1.02729	1.00663	0.793494	1.56061	1.6073	0.796656	1.14329	1.27196	0.735448
One- or two-tailed P value?	Two-tailed					59	1.14981	1.74928	1.27907	1.8219	1.17996	1.41803	1.84296	1.75053	1.74072	2.73345	1.43776	1.37435	2.02115		1.19425	1.15403	1.27011	0.931986	1.11422	1.05536	1.30002	1.24752	1.06016	1.1526	1.53764	1.35582	1.1032	0.937489	0.905545	0.948825	1.74521	1.68022	0.768401	1.12621	1.26667	0.947791
t, df	t=46.48, df=18					60	1.15644	1.94665	1.30815	1.77447	1.1996	1.43236	1.83216	1.58716	1.59294	2.60576	1.43897	1.36998	1.99941		1.21914	1.072	1.3308	0.872437	1.09754	1.09848	1.28668	1.29132	1.03269	1.14913	1.60075	1.16593	1.19774	0.987992	0.95867	0.905286	1.54668	1.56453	0.784926	1.10844	1.18129	0.871945
How big is the difference?
Mean of column A	1.655
Mean of column B	1.146
Difference between means (B - A) ± SEM	-0.5091 ± 0.01095
95% confidence interval	-0.5321 to -0.4861
R squared (eta squared)	0.9917
F test to compare variances
F, DFn, Dfd	2.781, 9, 9
P value	0.1436
P value summary	ns
Significantly different (P < 0.05)?	No
Data analyzed
Sample size, column A	10
Sample size, column B	10

## Sheet: FIG7 D
Table Analyzed	Input-output intensity 2						RH/RH + TNFa antibody																	RH/RH + Isotype																	w/w + TNFa antibody
						0.4	0.0720636	0.076987	0.096677	0.07474	0.076719	0.104371	0.052917	0.105376	0.287174	0.080908	0.098027	0.189291	0.190592	0.093202	0.204744			0.274174	0.294362	0.138695	0.068836	0.136828	0.143287	0.096836	0.114411	0.207238	0.124399	0.169909	0.137497	0.1363					0.0967867	0.0968708	0.126213	0.0817455	0.0961432	0.085292	0.10833	0.139744	0.100272
Two-way RM ANOVA	Matching: Stacked					0.6	0.162278	0.143603	0.143656	0.102802	0.142807	0.177433	0.163212	0.202699	0.531082	0.225295	0.174604	0.340045	0.405227	0.225196	0.366254			0.111487	0.634545	0.292781	0.131428	0.249506	0.321508	0.210902	0.310621	0.467172	0.256772	0.464577	0.22448	0.358652					0.246394	0.137735	0.262864	0.199782	0.206106	0.116476	0.195733	0.260545	0.154699
Assume sphericity?	Yes					0.8	0.236587	0.209811	0.278168	0.148224	0.250964	0.344703	0.27836	0.311798	0.844808	0.318466	0.365463	0.421612	0.597505	0.3556	0.426063			0.540195	0.989188	0.4798	0.238465	0.359187	0.491554	0.343618	0.449033	0.610023	0.414943	0.779372	0.497159	0.569913					0.414195	0.250675	0.404609	0.205162	0.318572	0.224329	0.257129	0.395689	0.246369
Alpha	0.05					1	0.30535	0.264221	0.359177	0.190271	0.335372	0.509781	0.3177	0.401198	1.06358	0.298903	0.399371	0.503782	0.822644	0.479011	0.49815			0.697941	1.24028	0.584607	0.337524	0.461473	0.648152	0.493393	0.594102	0.824164	0.563726	1.12975	0.62802	0.806066					0.532761	0.384911	0.504728	0.287191	0.378098	0.325521	0.447255	0.498469	0.338167
						1.2	0.411548	0.373666	0.397549	0.255456	0.396339	0.669392	0.449935	0.494729	1.17113	0.499501	0.485354	0.627149	0.955468	0.559642	0.586684			0.841057	1.55563	0.694146	0.428814	0.568103	0.828117	0.683547	0.719898	1.00906	0.642575	1.40564	0.750688	0.834896					0.580833	0.541256	0.613971	0.363473	0.519695	0.410058	0.538797	0.655766	0.493645
Source of Variation	% of total variation	P value	P value summary	Significant?		1.4	0.516764	0.422968	0.589207	0.387666	0.466856	0.797745	0.445766	0.557128	1.35762	0.608898	0.642963	0.719359	1.11671	0.671922	0.640209			1.02349	1.94363	0.816007	0.514405	0.673106	0.97047	0.84815	0.79203	1.15861	0.795439	1.62042	0.97405	1.04598					0.646936	0.630014	0.725632	0.488609	0.592798	0.501128	0.6059	0.793906	0.640619
Row Factor x Column Factor	3.124	<0.0001	****	Yes		1.6	0.599545	0.428204	0.622413	0.39477	0.571511	0.956068	0.483165	0.611322	1.5359	0.660018	0.713633	0.812458	1.28249	0.744264	0.66454			1.17835	2.26769	0.918719	0.582953	0.763181	1.15285	1.01647	0.926021	1.2934	0.883909	1.93772	1.14917	1.23574					0.678493	0.649456	0.798534	0.60064	0.642137	0.569038	0.681131	0.887843	0.774019
Row Factor	52.02	<0.0001	****	Yes
Column Factor	9.039	0.0029	**	Yes
Subject	28.22	<0.0001	****	Yes
ANOVA table	SS	DF	MS	F (DFn, DFd)	P value
Row Factor x Column Factor	1.303	18	0.07241	F (18, 300) = 6.579	P<0.0001
Row Factor	21.7	6	3.617	F (6, 300) = 328.6	P<0.0001
Column Factor	3.771	3	1.257	F (3, 50) = 5.338	P=0.0029
Subject	11.77	50	0.2355	F (50, 300) = 21.40	P<0.0001
Residual	3.302	300	0.01101
Data summary
Number of columns (Column Factor)	4
Number of rows (Row Factor)	7
Number of subjects (Subject)	54
Number of missing values	0
Within each row, compare columns (simple effects within rows)
Number of families	7
Number of comparisons per family	3
Alpha	0.05
Dunnett's multiple comparisons test	Predicted (LS) mean diff.	95.00% CI of diff.	Significant?	Summary	Adjusted P Value
0.4
RH/RH + Isotype vs. RH/RH + TNFa antibody	0.03688	-0.1485 to 0.2223	No	ns	0.9358
RH/RH + Isotype vs. w/w + anti-TNFα	0.05	-0.1419 to 0.2419	No	ns	0.8709
RH/RH + Isotype vs. w/w + Isotype	0.0267	-0.1652 to 0.2186	No	ns	0.9762
0.6
RH/RH + Isotype vs. RH/RH + TNFa antibody	0.07659	-0.1088 to 0.2620	No	ns	0.6402
RH/RH + Isotype vs. w/w + anti-TNFα	0.1046	-0.08728 to 0.2965	No	ns	0.429
RH/RH + Isotype vs. w/w + Isotype	0.06746	-0.1244 to 0.2593	No	ns	0.7408
0.8
RH/RH + Isotype vs. RH/RH + TNFa antibody	0.161	-0.02440 to 0.3464	No	ns	0.1044
RH/RH + Isotype vs. w/w + anti-TNFα	0.1933	0.001397 to 0.3852	Yes	*	0.0479
RH/RH + Isotype vs. w/w + Isotype	0.1592	-0.03270 to 0.3511	No	ns	0.1275
1
RH/RH + Isotype vs. RH/RH + TNFa antibody	0.2431	0.05774 to 0.4285	Yes	**	0.0061
RH/RH + Isotype vs. w/w + anti-TNFα	0.2474	0.05548 to 0.4393	Yes	**	0.0072
RH/RH + Isotype vs. w/w + Isotype	0.231	0.03915 to 0.4229	Yes	*	0.0133
1.2
RH/RH + Isotype vs. RH/RH + TNFa antibody	0.2877	0.1023 to 0.4731	Yes	***	0.0009
RH/RH + Isotype vs. w/w + anti-TNFα	0.2967	0.1048 to 0.4886	Yes	***	0.0009
RH/RH + Isotype vs. w/w + Isotype	0.2701	0.07820 to 0.4620	Yes	**	0.0029
1.4
RH/RH + Isotype vs. RH/RH + TNFa antibody	0.3507	0.1654 to 0.5361	Yes	****	<0.0001
RH/RH + Isotype vs. w/w + anti-TNFα	0.3781	0.1862 to 0.5699	Yes	****	<0.0001
RH/RH + Isotype vs. w/w + Isotype	0.3611	0.1692 to 0.5530	Yes	****	<0.0001
1.6
RH/RH + Isotype vs. RH/RH + TNFa antibody	0.4387	0.2533 to 0.6241	Yes	****	<0.0001
RH/RH + Isotype vs. w/w + anti-TNFα	0.4616	0.2697 to 0.6535	Yes	****	<0.0001
RH/RH + Isotype vs. w/w + Isotype	0.4503	0.2584 to 0.6422	Yes	****	<0.0001
Test details	Predicted (LS) mean 1	Predicted (LS) mean 2	Predicted (LS) mean diff.	SE of diff.	N1	N2	q	DF
0.4
RH/RH + Isotype vs. RH/RH + TNFa antibody	0.1571	0.1203	0.03688	0.07865	13	15	0.469	350
RH/RH + Isotype vs. w/w + anti-TNFα	0.1571	0.1071	0.05	0.08141	13	13	0.6142	350
RH/RH + Isotype vs. w/w + Isotype	0.1571	0.1304	0.0267	0.08141	13	13	0.328	350
0.6
RH/RH + Isotype vs. RH/RH + TNFa antibody	0.3103	0.2337	0.07659	0.07865	13	15	0.9739	350
RH/RH + Isotype vs. w/w + anti-TNFα	0.3103	0.2057	0.1046	0.08141	13	13	1.285	350
RH/RH + Isotype vs. w/w + Isotype	0.3103	0.2429	0.06746	0.08141	13	13	0.8287	350
0.8
RH/RH + Isotype vs. RH/RH + TNFa antibody	0.5202	0.3592	0.161	0.07865	13	15	2.047	350
RH/RH + Isotype vs. w/w + anti-TNFα	0.5202	0.3269	0.1933	0.08141	13	13	2.374	350
RH/RH + Isotype vs. w/w + Isotype	0.5202	0.361	0.1592	0.08141	13	13	1.956	350
1
RH/RH + Isotype vs. RH/RH + TNFa antibody	0.693	0.4499	0.2431	0.07865	13	15	3.091	350
RH/RH + Isotype vs. w/w + anti-TNFα	0.693	0.4456	0.2474	0.08141	13	13	3.039	350
RH/RH + Isotype vs. w/w + Isotype	0.693	0.462	0.231	0.08141	13	13	2.838	350
1.2
RH/RH + Isotype vs. RH/RH + TNFa antibody	0.8432	0.5556	0.2877	0.07865	13	15	3.658	350
RH/RH + Isotype vs. w/w + anti-TNFα	0.8432	0.5465	0.2967	0.08141	13	13	3.645	350
RH/RH + Isotype vs. w/w + Isotype	0.8432	0.5732	0.2701	0.08141	13	13	3.318	350
1.4
RH/RH + Isotype vs. RH/RH + TNFa antibody	1.014	0.6628	0.3507	0.07865	13	15	4.46	350
RH/RH + Isotype vs. w/w + anti-TNFα	1.014	0.6355	0.3781	0.08141	13	13	4.644	350
RH/RH + Isotype vs. w/w + Isotype	1.014	0.6524	0.3611	0.08141	13	13	4.436	350
1.6
RH/RH + Isotype vs. RH/RH + TNFa antibody	1.177	0.7387	0.4387	0.07865	13	15	5.578	350
RH/RH + Isotype vs. w/w + anti-TNFα	1.177	0.7158	0.4616	0.08141	13	13	5.67	350
RH/RH + Isotype vs. w/w + Isotype	1.177	0.7271	0.4503	0.08141	13	13	5.532	350
[truncated: 17 more columns]

## Sheet: FIG7 F
Table Analyzed	LTP2 last 10 mins				Minutes	RH/RH + TNFa antibody																	RH/RH + Isotype																	w/w + TNFa antibody
Data sets analyzed	A-D				51	2.3966	2.02188	1.77435	1.35105	2.63895	1.37344	2.10608	1.95297	1.81991	1.92321	2.33823	1.42634	2.15084					1.34477	0.855242	1.01431	1.33043	0.689435	1.37948	0.805722	1.15739	0.859918	1.34475	1.57936	0.946302	1.43963	1.11121				3.15025	2.14636	0.978032	2.285	1.57568	1.3612	1.22647	1.12227	1.77598	1.27724
					52	2.13933	1.84269	1.90168	1.36947	2.91212	1.30854	2.32679	1.88682	1.6571	2.20797	2.4309	1.48614	2.1548					1.31171	0.872692	1.07265	1.26385	0.673126	1.05886	0.817584	1.00995	1.09134	1.29435	1.54026	1.14061	1.33139	1.09816				2.99622	2.28097	1.13526	1.91316	1.52995	1.39471	1.35284	1.19735	1.74191	1.2304
ANOVA summary					53	2.22903	2.08626	2.02118	1.26268	2.93575	1.31299	2.60649	1.69571	1.7582	2.12993	2.43662	1.42185	2.19952					1.31655	0.860941	1.08422	1.2972	0.67315	1.1721	0.907565	1.05077	1.3395	1.28134	1.52642	1.17055	1.43977	1.12176				3.53223	2.21517	1.1871	1.8871	1.6442	1.52285	1.09714	1.19611	1.78001	1.3634
F	1490				54	2.28186	2.16472	2.02643	1.42675	2.83723	1.31722	2.65115	1.95557	1.82996	2.35379	2.38291	1.48078	2.24502					1.28511	0.815901	1.13135	1.34286	0.642222	1.08402	0.932867	1.05411	1.10166	1.2611	1.50872	1.2332	1.4395	1.04981				3.40398	2.41387	1.26115	1.88551	1.6077	1.35427	1.02736	1.22694	1.68051	1.34004
P value	<0.0001				55	1.98429	2.16708	2.10647	1.38072	2.97051	1.43964	2.31412	1.88704	1.77363	2.11371	2.36445	1.51386	2.21402					1.30842	0.819862	1.12685	1.28256	0.686102	1.08155	0.787779	0.958995	1.14948	1.26462	1.52835	0.864593	1.44722	1.01622				3.25192	2.49608	1.17603	2.06742	1.3917	1.18965	1.48141	1.16866	1.73704	1.26418
P value summary	****				56	2.26507	2.11772	1.96593	1.31842	3.20349	1.27788	2.30175	2.07731	1.90906	1.91952	2.39151	1.42222	2.14328					1.28632	0.851096	1.0992	1.27667	0.714091	1.20739	0.974019	0.967234	1.24416	1.25169	1.43717	1.0704	1.42066	1.03171				3.62215	2.55891	1.08719	2.12712	1.61285	1.6627	1.24568	1.19113	1.67892	1.30573
Significant diff. among means (P < 0.05)?	Yes				57	2.39604	2.06189	1.983	1.35836	3.31684	1.40051	2.33846	1.97399	1.88394	1.94293	2.4309	1.41695	2.18402					1.29528	0.870091	0.972758	1.29542	0.665932	0.955599	1.031	1.02213	1.26026	1.31211	1.45652	0.943778	1.48661	1.14751				3.4095	2.46937	1.17571	2.2955	1.49999	1.43158	1.12874	1.26321	1.8914	1.40171
R squared	0.992				58	2.23985	2.11937	2.05833	1.34077	3.24837	1.38209	2.50257	1.97731	1.77316	1.94838	2.42334	1.52617	2.0668					1.32769	0.843678	0.995105	1.22508	0.632115	1.0775	0.98014	1.13472	1.27764	1.3607	1.5201	1.04651	1.50331	1.09593				3.50209	2.39894	1.08761	2.11833	1.52113	1.19517	1.04253	1.20898	1.85378	1.26765
					59	2.20133	2.19004	2.07915	1.39749	3.12009	1.34265	2.40286	1.9063	1.7906	2.12394	2.35081	1.48712	2.25185					1.29068	0.826085	1.17291	1.25758	0.639326	1.20506	0.890515	1.05904	1.43247	1.34934	1.51019	1.00132	1.34652	1.1026				3.40876	2.30584	1.29308	2.02178	1.77931	1.33168	0.974421	1.28553	1.73699	1.22507
Brown-Forsythe test					60	2.32733	2.10117	2.03218	1.33519	3.14322	1.32247	2.12243	1.81805	1.85757	1.99591	2.34089	1.44537	2.30528					1.2619	0.818024	1.19636	1.26037	0.604038	1.09706	0.856913	1.15409	1.4055	1.387	1.44694	1.06564	1.37568	1.12811				3.35289	2.39662	1.2306	1.70901	1.69922	1.90424	1.19135	1.26184	1.66989	1.21443
F (DFn, DFd)	0.9784 (3, 36)
P value	0.4137
P value summary	ns
Are SDs significantly different (P < 0.05)?	No
Bartlett's test
Bartlett's statistic (corrected)	4.239
P value	0.2368
P value summary	ns
Are SDs significantly different (P < 0.05)?	No
ANOVA table	SS	DF	MS	F (DFn, DFd)	P value
Treatment (between columns)	4.435	3	1.478	F (3, 36) = 1490	P<0.0001
Residual (within columns)	0.03573	36	0.0009924
Total	4.471	39
Data summary
Number of treatments (columns)	4
Number of values (total)	40
Number of families	1
Number of comparisons per family	3
Alpha	0.05
Sidak's multiple comparisons test	Mean Diff.	95.00% CI of diff.	Significant?	Summary	Adjusted P Value	A-?
RH/RH + anti-TNFα vs. RH/RH + Isotype	0.887	0.8518 to 0.9223	Yes	****	<0.0001	B	RH/RH + Isotype
RH/RH + anti-TNFα vs. w/w + anti-TNFα	0.2458	0.2105 to 0.2811	Yes	****	<0.0001	C	w/w + anti-TNFα
RH/RH + anti-TNFα vs. w/w + Isotype	0.1986	0.1633 to 0.2339	Yes	****	<0.0001	D	w/w + Isotype
Test details	Mean 1	Mean 2	Mean Diff.	SE of diff.	n1	n2	t	DF
RH/RH + anti-TNFα vs. RH/RH + Isotype	2.02	1.133	0.887	0.01409	10	10	62.96	36
RH/RH + anti-TNFα vs. w/w + anti-TNFα	2.02	1.774	0.2458	0.01409	10	10	17.45	36
RH/RH + anti-TNFα vs. w/w + Isotype	2.02	1.821	0.1986	0.01409	10	10	14.1	36
[truncated: 12 more columns]
